# Supplementary material
Source: publisher figshare collection journal article supplement (https://frontiersin.figshare.com/ndownloader/files/22852076)
Supplement: Supplementary file [file 22852076]

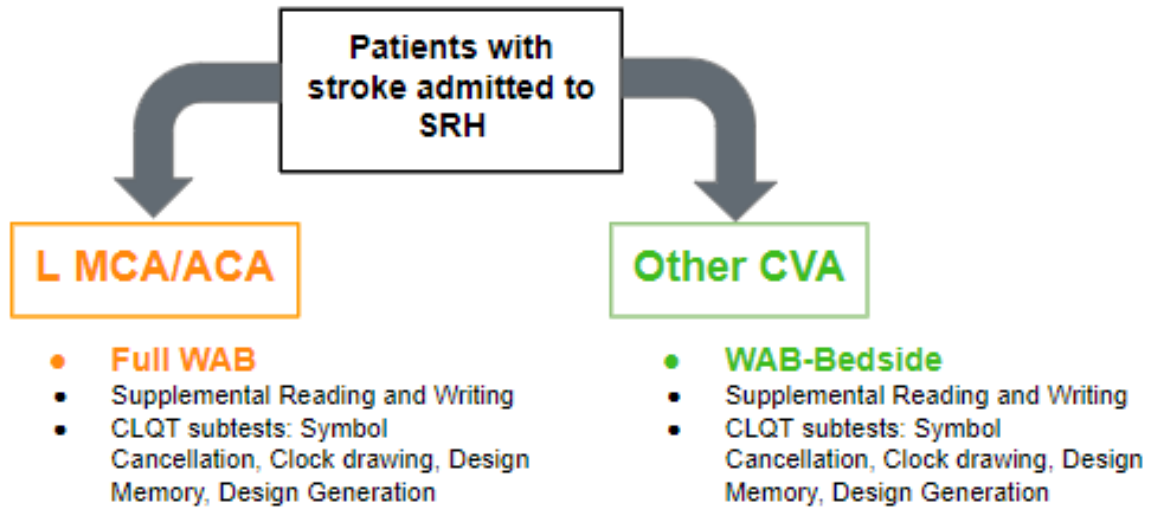

Supplemental Figure 1: Assessment pathway for patients admitted with a stroke to Spaulding Rehabilitation Hospital
